# Supplementary material
Source: ML conference proceedings conference paper supplement (https://openaccess.thecvf.com/content/ICCV2025/html/Lee_Emulating_Self-attention_with_ICCV_2025_paper.html)
Supplement: Supplementary file 1 [file Lee_Emulating_Self-attention_with_ICCV_2025_supplemental.pdf]

# Emulating Self-attention with Convolution for Efficient Image Super-Resolution

## Supplementary Material

The supplementary includes implementation details of Flash Attention (FA) and proposed networks, additional results on the arbitrary-scale super-resolution (SR) tasks, quantitative results on real-world SR tasks, efficiency comparison beyond GPUs, and classic SR results on larger model sizes.

### 6. Flash Attention Implementation Details

FA [10] implements self-attention by fusing kernels and avoiding materializing a full score matrix ( $S = QK^T$ ), thereby significantly reducing both memory footprint and latency. Although FA has been widely adopted across various domains, such as classification and generation, its application to SR tasks has been limited. In order to alleviate the self-attention’s memory bottleneck, we attempted to integrate FA directly into SR architectures. However, we observed that naively applying FA leads to highly unstable training. We verified that this instability stems from FA’s fused-kernel design, which blocks the use of relative positional bias (RelPos) [40, 49]. As shown in Table 6, training loss diverges when FA is employed without RelPos. A common alternative is to use Rotary Positional Encoding (RoPE) [23, 51], which rotates query and key tensors for positional conditioning and therefore remains compatible with fused kernels [65, 66]. Nonetheless, our experiments demonstrate that even this approach fails to deliver acceptable performance in the SR setting. To address these challenges, we leverage Flex Attention [14], which supports both user-defined score modifications and FA. Our implementation not only resolves the memory bottleneck but also achieves superior performance by leveraging the  $32 \times 32$  window size for self-attention.

Table 6. Comparisons on performance by FA implementation.

| Type                        | FA [10]   | FA w/ RoPE [23] | FA w/ RelPos (Ours)   |
|-----------------------------|-----------|-----------------|-----------------------|
| PSNR/SSRM (U100 $\times$ 2) | NaN / NaN | 32.76 / 0.9343  | <b>33.46 / 0.9395</b> |

### 7. Network Implementation Details

This section describes the details of the implementation of our methods. We begin by outlining the basic model configuration for each task, which includes the hyperparameters  $C$ ,  $N$ , and  $M$ . Here,  $C$  represents the number of channels,  $N$  denotes the number of ESCBlocks, and  $M$  indicates the number of ConvAttns. Next, we describe additional components, such as the compositions of  $U$  and  $S$ , among others. Finally, we present the training details, which

cover the training datasets, the number of training iterations, the learning rate, optimizer configurations, the loss function used, and the training batch and patch size.

#### 7.1. Classic SR

Three variants are introduced in the classic SR task: ESC-FP, ESC-light, and ESC. ESC-FP is a variant needed when it is necessary to reduce FLOPs and parameter size, while ESC-light and ESC are variants needed when it is necessary to reduce latency. The basic configurations for each variant are as follows: for ESC-FP,  $C$ ,  $N$ , and  $M$  are 48, 5, and 5; for ESC-light, they are 64, 3, and 5; and for ESC, they are 64, 5, and 5. All variants use Sub-Pixel Convolution (SPConv) [50] as  $U$ . ESC-light and ESC utilize the repeat function [16] as  $S$  and add  $F^s$  before the pixel shuffle of SPConv, while ESC-FP employs bicubic interpolation as  $S$  and adds  $F^s$  to the output of SPConv. Furthermore, ESC-FP employs decomposed  $LK$  to further reduce FLOPs and parameter size and utilizes extra layer normalizations in front of the ConvFFNs. Lastly, hidden dimension ( $h$ ) for kernel estimators is set to 8 for ESC and ESC-FP, while ESC-FP uses 4. For training, we use the DIV2K [1] dataset, and for the data scaling experiments, we employ the DIV2K+Flickr2K+LSDIR+Diverseseg-IP (DFLIP) [34, 45, 54] dataset. Training our networks lasts for 500K iterations, and the optimizer used is AdamW [41] with  $\beta$ s of 0.9 and 0.9 and a learning rate of  $5e-4$ . We use L1 loss and 64 patches of size  $64 \times 64$  as input to train. The networks of scale  $\times 3$  and  $\times 4$  are fine-tuned from the results of the  $\times 2$ . To train other methods [73, 76, 82] for data scaling experiments, we follow the training details described in their paper.

#### 7.2. Arbitrary-scale SR

For the Arbitrary-scale SR task, we use the same basic configuration as the ESC. The difference between the ESC in Classic SR and the ESC in arbitrary-scale SR is that LTE [32] is used as  $U$ , and accordingly,  $S$  is also changed to bilinear interpolation. Training details, including other models [73, 76], are the same as LTE across all instances, using the DIV2K dataset, running for 1000 epochs, utilizing the Adam [30] with  $\beta$ s of 0.9 and 0.999, and leveraging L1 loss. However, since HiT-SRF and our ESC are optimized for training with the input patches of  $64 \times 64$ , we train all Transformers leveraging 32 input patches of size  $64 \times 64$ . Still, the number of sampling coordinates for training remains the same as RDN+LTE, which is 2304 ( $48^2$ ).

Table 7. Quantitative comparison on arbitrary-scale SR task employing LTE [32] as upsampler. The best result on PSNR is bolded.

| Methods                       | Set5         |              |              |              |              | Set14        |              |              |              |              | B100         |              |              |              |              | Urban100     |              |              |              |              |
|-------------------------------|--------------|--------------|--------------|--------------|--------------|--------------|--------------|--------------|--------------|--------------|--------------|--------------|--------------|--------------|--------------|--------------|--------------|--------------|--------------|--------------|
|                               | Seen         |              |              | Unseen       |              | Seen         |              |              | Unseen       |              | Seen         |              |              | Unseen       |              | Seen         |              |              | Unseen       |              |
|                               | $\times 2$   | $\times 3$   | $\times 4$   | $\times 6$   | $\times 8$   | $\times 2$   | $\times 3$   | $\times 4$   | $\times 6$   | $\times 8$   | $\times 2$   | $\times 3$   | $\times 4$   | $\times 6$   | $\times 8$   | $\times 2$   | $\times 3$   | $\times 4$   | $\times 6$   | $\times 8$   |
| RDN+LTE [78]                  | 38.23        | 34.72        | 32.61        | <b>29.32</b> | <b>27.26</b> | <b>34.09</b> | 30.58        | 28.88        | <b>26.71</b> | 25.16        | 32.36        | 29.30        | <b>27.77</b> | <b>26.01</b> | 24.95        | 33.04        | 28.97        | 26.81        | 24.28        | 22.88        |
| ATD-It+LTE <sup>§</sup> [73]  | 38.28        | 34.73        | 32.57        | 29.21        | 27.22        | 34.14        | 30.64        | 28.91        | 26.67        | 25.21        | 32.35        | 29.30        | <b>27.77</b> | <b>26.01</b> | 24.95        | 33.12        | 29.06        | 26.95        | 24.41        | 23.00        |
| HiT-SRF+LTE <sup>§</sup> [76] | 38.27        | 34.74        | 32.59        | 29.25        | 27.21        | 34.03        | 30.64        | 28.91        | 26.68        | 25.21        | 32.37        | 29.30        | 27.76        | 26.00        | 24.94        | 33.18        | 29.05        | 26.89        | 24.34        | 22.94        |
| ESC+LTE (Ours)                | <b>38.29</b> | <b>34.79</b> | <b>32.72</b> | 29.18        | 27.24        | 34.05        | <b>30.69</b> | <b>28.94</b> | 26.70        | <b>25.24</b> | <b>32.38</b> | <b>29.32</b> | <b>27.77</b> | 26.00        | <b>24.96</b> | <b>33.30</b> | <b>29.21</b> | <b>27.04</b> | <b>24.44</b> | <b>23.03</b> |

### 7.3. Real-world SR

For the real-world SR task, we introduce ESC-Real with a basic configuration of 64, 10, and 5, which denote  $C$ ,  $N$ , and  $M$ , respectively. ESC-Real employs the same upsampler as RealESRGAN [59] and SwinIR-Real [36], utilizing it as  $U$ , and incorporates four layers of shallow network ( $c128k1g1-c128k7g128-LeakyReLU(\alpha = 0.2)-c64k1g1$ ) as  $S$ . Here,  $c$ ,  $k$ , and  $g$  denote channel, kernel, and group size for convolution, respectively. In this approach,  $F^s$  is added into  $F$ . We use the RealESRGAN degradation model and DF2KOST [58] dataset to generate low-quality images. ESC-real is first trained for 1M iterations using L1 loss, then trained for 400K iterations with L1 loss, adversarial loss, and perceptual loss, using weight factors of 1, 0.1, and 1, respectively. The network architectures used for calculating adversarial loss and perceptual loss are the same as those used in RealESRGAN. In both phases, 48 patches of size  $64 \times 64$  are used as input for training.

## 8. Additional Results on Arbitrary-scale SR

This section exhibits additional results on the arbitrary-scale SR task. Additional quantitative results are measures on the four commonly used evaluation datasets, including Set5 [3], Set14 [70], B100 [42], and Urban100 [26]. Following previous research [32], we measure Peak Signal-to-Noise Ratio (PSNR) on the Y channel after cropping the image’s boundary equivalent to the upscaling factor and converting it to YCbCr color space. Our ESC+LTE outperforms other methods on Urban100 at both seen and unseen scales, as shown in Table 7.

## 9. Quantitative Results on Real-world SR

Taking a step further, we report quantitative results for the real-world SR task. To this end, we measure a variety of metrics (PSNR@Y, SSIM@Y, LPIPS [74], DISTS [11], FID [24], NIQE [44], MANIQA [64], MUSIQ [27], and CLIP-IQA [57]) on multiple datasets (RealLQ250 [2], RealSRSet [72], RealSR [4], and DRealSR [60]). As shown in Table 8, ESC-Real achieves the highest CLIP-IQA scores on all datasets, demonstrating its ability to reconstruct perceptually superior images.

Table 8. Quantitative comparisons on real-world SR.

| Dataset        | Metrics    | RealESRGAN+ | SwinIR-Real | DASR   | ESC-Real |
|----------------|------------|-------------|-------------|--------|----------|
| RealLQ250 [2]  | NIQE ↓     | 4.1328      | 4.1779      | 4.7858 | 4.0556   |
|                | MANIQA ↑   | 0.3564      | 0.3400      | 0.2789 | 0.3553   |
|                | MUSIQ ↑    | 62.51       | 60.48       | 53.02  | 62.98    |
|                | CLIP-IQA ↑ | 0.5437      | 0.5348      | 0.4631 | 0.5796   |
| RealSRSet [72] | NIQE ↓     | 5.3430      | 5.1037      | 4.5931 | 5.0181   |
|                | MANIQA ↑   | 0.3988      | 0.3872      | 0.3277 | 0.3952   |
|                | MUSIQ ↑    | 64.25       | 63.68       | 58.82  | 64.58    |
|                | CLIP-IQA ↑ | 0.5942      | 0.5921      | 0.5278 | 0.6156   |
| RealSR [4]     | PSNR ↑     | 24.53       | 24.71       | 25.86  | 24.52    |
|                | SSIM ↑     | 0.7484      | 0.7547      | 0.7617 | 0.7503   |
|                | LPIPS ↓    | 0.2729      | 0.2594      | 0.3113 | 0.2622   |
|                | DISTS ↓    | 0.1685      | 0.1609      | 0.1838 | 0.1671   |
|                | FID ↓      | 67.01       | 64.19       | 63.62  | 66.81    |
|                | NIQE ↓     | 4.6801      | 4.6465      | 5.9682 | 4.4848   |
|                | MANIQA ↑   | 0.3675      | 0.3504      | 0.2663 | 0.3799   |
|                | MUSIQ ↑    | 59.69       | 59.64       | 45.82  | 61.40    |
|                | CLIP-IQA ↑ | 0.4903      | 0.4736      | 0.3629 | 0.5338   |
| DRealSR [60]   | PSNR ↑     | 26.59       | 26.52       | 28.40  | 26.76    |
|                | SSIM ↑     | 0.7988      | 0.7923      | 0.8302 | 0.79534  |
|                | LPIPS ↓    | 0.2818      | 0.2838      | 0.2962 | 0.2795   |
|                | DISTS ↓    | 0.1464      | 0.1461      | 0.1689 | 0.1503   |
|                | FID ↓      | 23.19       | 24.63       | 17.89  | 21.35    |
|                | NIQE ↓     | 4.7164      | 4.5683      | 6.3473 | 4.7006   |
|                | MANIQA ↑   | 0.3431      | 0.3275      | 0.2733 | 0.3442   |
|                | MUSIQ ↑    | 35.27       | 34.62       | 28.63  | 35.21    |
|                | CLIP-IQA ↑ | 0.5179      | 0.5039      | 0.3843 | 0.5564   |

Table 9. Comparisons of latency on MacBook M2 air, and iPhone 12

| Methods                                                 | ELAN-It | OmniSR | ASID-D8 | HiT-SRF  | ESC-It        | ESC           |
|---------------------------------------------------------|---------|--------|---------|----------|---------------|---------------|
| M2Air ( $X \in \mathbb{R}^{128 \times 128 \times 3}$ )  | 318.51  | Failed | Failed  | 88145.85 | <b>124.07</b> | <b>181.16</b> |
| iPhone12 ( $X \in \mathbb{R}^{32 \times 32 \times 3}$ ) | 38.12   | Failed | Failed  | OOM      | <b>25.57</b>  | <b>42.78</b>  |

## 10. Efficiency Comparisons beyond GPUs

In real-world deployment scenarios, networks often run on devices with far more constrained resources than GPUs. To evaluate our method under such conditions, we benchmarked several Transformer-based SR models (ELAN [75], OmniSR [56], ASID-D8 [47], HiT-SRF [76]) against our ESC-It on a MacBook Air M2 and an iPhone 12. As detailed in Table 9, whereas the other Transformers either fail to compile or incur out-of-memory (OOM) errors, ESC-It achieves up to a 61% reduction in latency compared to ELAN-light, demonstrating its efficiency in real-world deployments.

Table 10. Comparisons of larger classic SR methods (Params>10M). PT denotes pre-training with  $64\times 64$  patches and FT denotes fine-tuning with  $96\times 96$  patches.

| Method          | Scale      | #Params (M) | Set5         | Set14        | PSNR / SSIM<br>B100 | Urban100     | Manga109     |
|-----------------|------------|-------------|--------------|--------------|---------------------|--------------|--------------|
| SwinIR [36]     | $\times 2$ | 11.8        | 38.42/0.9623 | 34.46/0.9250 | 32.53/0.9041        | 33.81/0.9433 | 39.92/0.9797 |
| EDT-B [33]      |            | 11.5        | 38.63/0.9632 | 34.80/0.9273 | 32.62/0.9052        | 34.27/0.9456 | 40.37/0.9811 |
| CAT-A [9]       |            | 16.5        | 38.51/0.9626 | 34.78/0.9265 | 32.59/0.9047        | 34.26/0.9440 | 40.10/0.9805 |
| ART [71]        |            | 16.4        | 38.56/0.9629 | 34.59/0.9267 | 32.58/0.9048        | 34.30/0.9452 | 40.24/0.9808 |
| ACT [67]        |            | 46.0        | 38.46/0.9626 | 34.60/0.9256 | 32.56/0.9048        | 34.07/0.9443 | 39.95/0.9804 |
| SRFormer [82]   |            | 10.5        | 38.51/0.9627 | 34.44/0.9253 | 32.57/0.9046        | 34.09/0.9449 | 40.07/0.9802 |
| <b>ESC (PT)</b> |            | 12.5        | 38.52/0.9626 | 34.57/0.9257 | 32.58/0.9045        | 34.24/0.9450 | 40.18/0.9803 |
| <b>ESC (FT)</b> |            | 12.5        | 38.59/0.9630 | 34.70/0.9259 | 32.61/0.9052        | 34.49/0.9466 | 40.38/0.9809 |
| SwinIR [36]     | $\times 3$ | 11.9        | 34.97/0.9318 | 30.93/0.8534 | 29.46/0.8145        | 29.75/0.8826 | 35.12/0.9537 |
| EDT-B [33]      |            | 11.7        | 35.13/0.9328 | 31.09/0.8553 | 29.53/0.8165        | 30.07/0.8863 | 35.47/0.9550 |
| CAT-A [9]       |            | 16.6        | 35.06/0.9326 | 31.04/0.8538 | 29.52/0.8160        | 30.12/0.8862 | 35.38/0.9546 |
| ART [71]        |            | 16.6        | 35.07/0.9325 | 31.02/0.8541 | 29.51/0.8159        | 30.10/0.8871 | 35.39/0.9548 |
| ACT [67]        |            | 46.0        | 35.03/0.9321 | 31.08/0.8541 | 29.51/0.8164        | 30.08/0.8858 | 35.27/0.9540 |
| SRFormer [82]   |            | 10.7        | 35.02/0.9323 | 30.94/0.8540 | 29.48/0.8156        | 30.04/0.8865 | 35.26/0.9543 |
| <b>ESC (FT)</b> |            | 12.5        | 35.14/0.9330 | 31.10/0.8552 | 29.53/0.8167        | 30.23/0.8895 | 35.60/0.9555 |
| SwinIR [36]     | $\times 4$ | 11.9        | 32.92/0.9044 | 29.09/0.7950 | 27.92/0.7489        | 27.45/0.8254 | 32.03/0.9260 |
| EDT-B [33]      |            | 11.6        | 33.06/0.9055 | 29.23/0.7971 | 27.99/0.7510        | 27.75/0.8317 | 32.39/0.9283 |
| CAT-A [9]       |            | 16.6        | 33.08/0.9052 | 29.18/0.7960 | 27.99/0.7510        | 27.89/0.8339 | 32.39/0.9285 |
| ART [71]        |            | 16.6        | 33.04/0.9051 | 29.16/0.7958 | 27.97/0.7510        | 27.77/0.8321 | 32.31/0.9283 |
| ACT [67]        |            | 46.0        | 32.97/0.9031 | 29.18/0.7954 | 27.95/0.7507        | 27.74/0.8305 | 32.20/0.9267 |
| SRFormer [82]   |            | 10.6        | 32.93/0.9041 | 29.08/0.7953 | 27.94/0.7502        | 27.68/0.8311 | 32.21/0.9271 |
| <b>ESC (FT)</b> |            | 12.5        | 33.00/0.9054 | 29.21/0.7968 | 27.95/0.7504        | 27.89/0.8351 | 32.54/0.9295 |

## 11. Classic SR Results on Larger Model Size

Although we have demonstrated substantial performance gains over lightweight Transformers (Params<1M), larger models (Params>10M) remain an active area of research. To assess our method in this regime, we scale ESC to 12.5M parameters, on par with the size of SwinIR, and train and evaluate it accordingly. The scaled ESC uses the window size of  $48\times 48$ ,  $N = 8$ ,  $M = 5$ ,  $C = 192$ ,  $C_{\text{ConvAttn}} = 48$ , and  $h = 24$ . Extra layer normalizations are placed before the ConvFFNs. We leverage the DF2K dataset and follow the ATD’s training strategy [73], pre-training on small patches ( $64\times 64$ ) and then fine-tuning on larger patches ( $96\times 96$ ). Table 10 shows that ESC delivers performance on par with other large-scale SR Transformers.
